# Supplementary material
Source: PubMed Central journal article supplement (PMC6937590)
Supplement: supp_RA119.010480_154952_2_supp_425965_q0ssh8.pdf [file supp_RA119.010480_154952_2_supp_425965_q0ssh8.pdf]

## Supplemental Data for:

A phenotype-directed chemical screen identifies ponalrestat as an inhibitor of the plant flavin monooxygenase YUCCA in auxin biosynthesis

Ying Zhu<sup>1</sup>, Hong-jiang Li<sup>2, &</sup>, Qi Su<sup>3, #</sup>, Jing Wen<sup>3, †</sup>, Yuefan Wang<sup>3, ‡</sup>, Wen Song<sup>4</sup>, Yinpeng Xie<sup>1</sup>, Wenrong He<sup>5</sup>, Zhen Yang<sup>3, §</sup>, Kai Jiang<sup>1, 6\*</sup>, Hongwei Guo<sup>1\*</sup>

<sup>1</sup>Institute of Plant and Food Science, Department of Biology, Southern University of Science and Technology (SUSTech), Shenzhen, Guangdong 518055, China; <sup>2</sup>State Key Laboratory of Protein and Plant Gene Research, College of Life Science, Peking University, Beijing 100971, China; <sup>3</sup>Key Laboratory of Bioorganic Chemistry and Molecular Engineering of Ministry of Education and Beijing National Laboratory for Molecular Science (BNLMS), and Peking-Tsinghua Center for Life Sciences, Peking University, Beijing 100871, China; <sup>4</sup>Max-Planck Institute for Plant Breeding Research, Cologne 50829, Germany; <sup>5</sup>Salk Institute for Biological Studies, Plant Molecular and Cellular Biology Laboratory, La Jolla, California 92037, USA; <sup>6</sup>SUSTech Academy for Advanced and Interdisciplinary Studies, Southern University of Science and Technology (SUSTech), Shenzhen, Guangdong 518055.

Running title: Ponalrestat is an inhibitor of YUCCA in *Arabidopsis*

&Current address: BioCentury Inc.

#Current address: Department of Chemistry, Johns Hopkins University, 3400N. Charles St., Baltimore, MD 21218, USA.

†Current address: School of Pharmacy, North Sichuan Medicine College, Nanchong 637100, China.

‡Current address: Department of Pathology, Johns Hopkins University School of Medicine, Baltimore, MD 21231, USA.

§Current address: State Key Laboratory of Chemical Oncogenomics and Key Laboratory of Chemical Genomics, Peking University Shenzhen Graduate School, Shenzhen 518055, China.

\*To whom correspondence should be addressed: [jiangk@sustech.edu.cn](mailto:jiangk@sustech.edu.cn) or [guohw@sustech.edu.cn](mailto:guohw@sustech.edu.cn),

### Supplemental Data included:

- Supplemental figures (Figure S1-6)
- Supplemental text (File S1)
- Supplemental reference

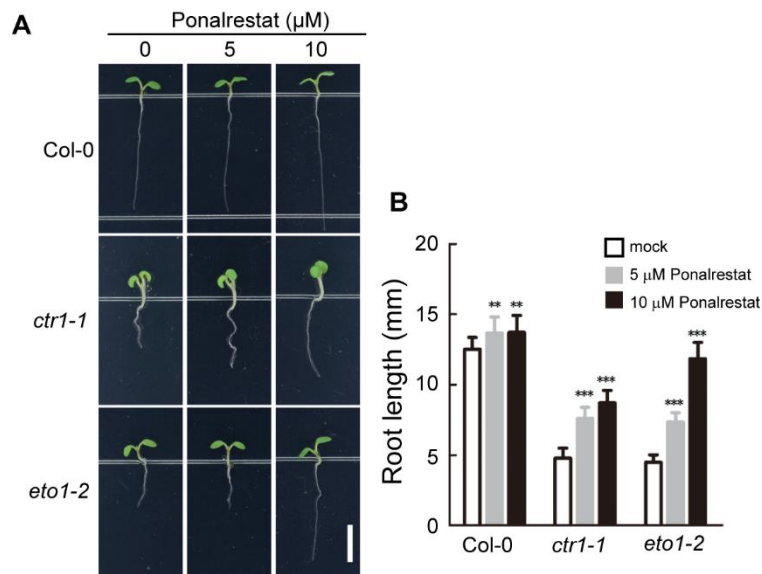

**Figure S1.** Ponalrestat promotes root elongation in de-etiolated seedlings. (A) Representative five-day-old Col-0, *ctr1-1*, and *eto1-2* seedlings in response to ponalrestat treatment. Scale bar = 5 mm. (B) Quantification of the primary root lengths of the five-day-old seedlings shown in (A). Bars represent means  $\pm$  SD of at least 10 seedlings; a Student's *t*-test was used to compare ponalrestat-treated and mock-treated seedlings (\*\*\* $P < 0.001$ ). The experiment was repeated for at least three times with similar results.

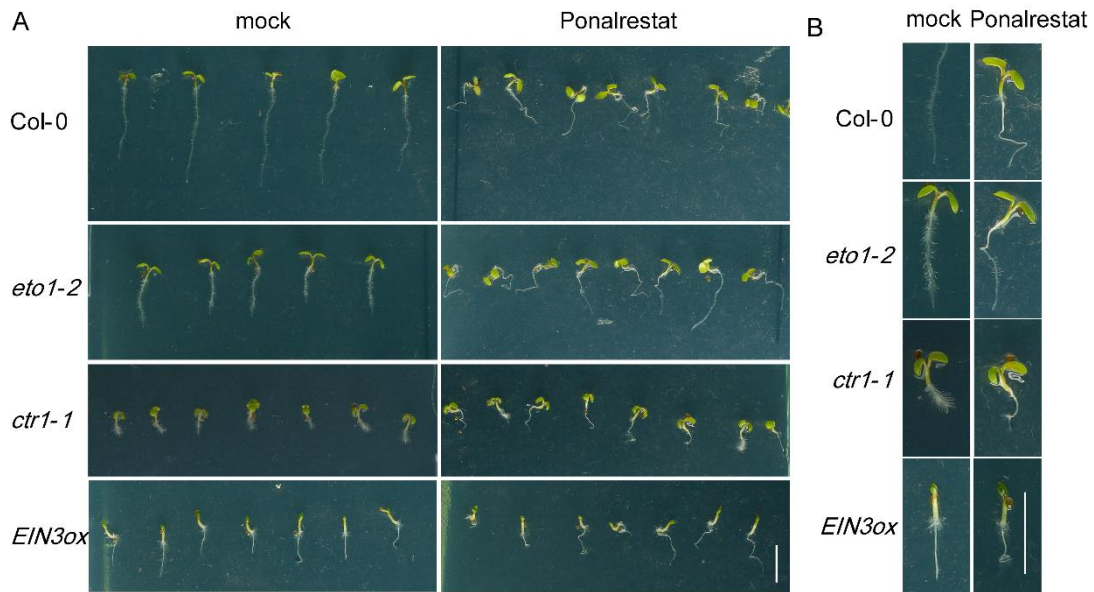

**Figure S2.** Ponalrestat attenuates the gravitropism of the primary root in ethylene-related mutants. After stratification for three days, the seeds were germinated and grown vertically for five days at 22 °C with light on 1/2 MS medium containing 10  $\mu$ M ponalrestat or DMSO as the mock control. (A) Col-0 and mutant seedlings grown on vertical plates. (B) Representative seedlings from (A) showing the changes in root hair growth. Scale bars = 5 mm. The experiment was repeated for at least three times with similar results.

|             |   |   |   |   |
|-------------|---|---|---|---|
| Ponalrestat | - | + | - | + |
| ACC         | - | - | + | + |

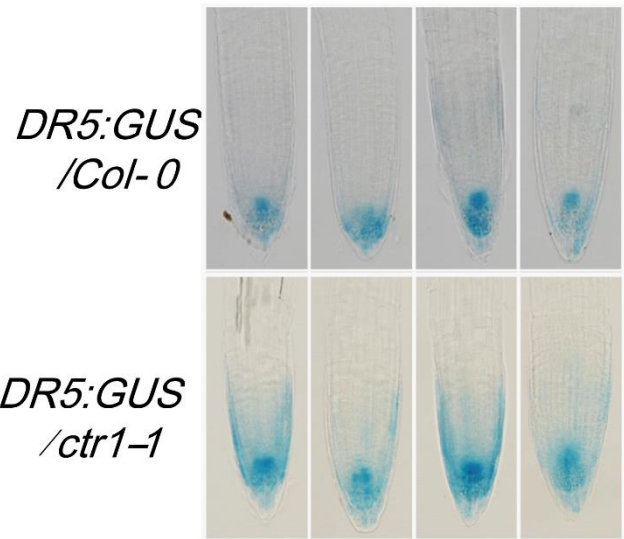

**Figure S3.** GUS staining of the *DR5:GUS* lines in the Col-0 or *ctr1-1* backgrounds. The seedlings were grown in the dark for three days on 1/2 MS medium containing ponalrestat (5  $\mu$ M) and/or ACC (10  $\mu$ M) or DMSO as the mock control followed by GUS staining. The experiment was repeated for at least three times with similar results.

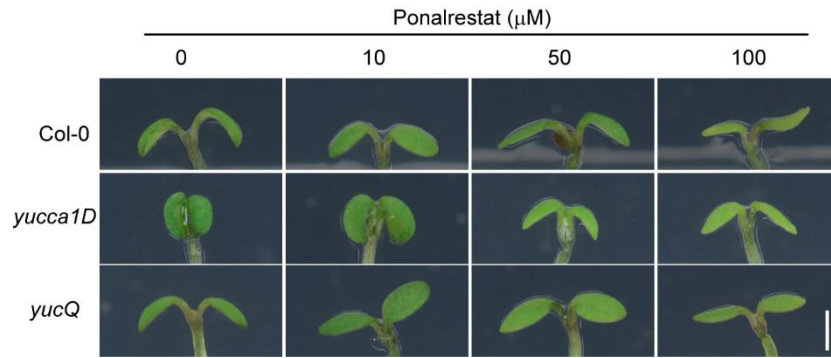

**Figure S4.** Observation of *YUC* mutants in response to ponalrestat. Col-0, *yucca1D*, and *yucQ* seeds were germinated and grown for five days on 1/2 MS medium supplemented with ponalrestat. Scale bar = 2 mm. The experiment was repeated for at least three times with similar results.

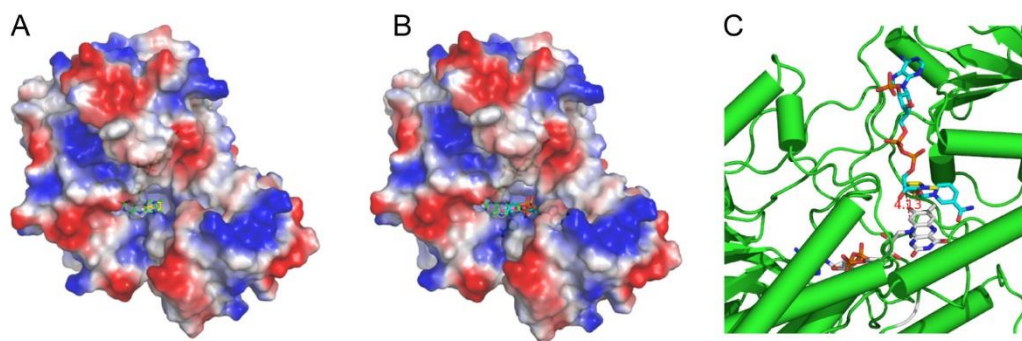

**Figure S5.** Structures of FMO and ligands. (A) Structure of FMO in complex with MET (in yellow) and FAD (in green) (PDB: 2GVC). (B) Structure of FMO in complex with NAD (in cyan) and FAD (in green) (PDB: 2GV8). (C) Structure alignment of FMO (in green) in complex with MET (in yellow) and NAD (in cyan). The distance from overlap site of FMO and MET to flavin group of FAD (in gray) is 4.13 Å indicated with red dash line.



## File S1

The synthetic procedure was followed the published reference<sup>1</sup>.

**PRT:** <sup>1</sup>H-NMR (400 MHz, CDCl<sub>3</sub>): δ = 12.70 (s br, 1H), 8.15 (d, *J* = 7.6 Hz, 1H), 7.99-7.87 (m, 3H), 7.56 (dd, *J* = 9.6, 1.6 Hz, 1H), 7.36 (dd, *J* = 8.4, 1.6 Hz, 1H), 7.21 (t, *J* = 8.4 Hz, 1H), 5.34 (s, 2H), 3.99 (s, 2H); HRMS (ESI): *m/z* calcd for C<sub>17</sub>H<sub>13</sub>BrFN<sub>2</sub>O<sub>3</sub> [M+H]<sup>+</sup>: 391.00881, found 391.00888.

**Compound 1:** <sup>1</sup>H-NMR (400 MHz, CDCl<sub>3</sub>): δ = 12.92 (s br, 1H), 8.28 (d, *J* = 7.6 Hz, 1H), 8.03 (d, *J* = 8.0 Hz, 1H), 7.96 (t, *J* = 7.6 Hz, 1H), 7.88 (t, *J* = 7.6 Hz, 1H), 7.55 (d, *J* = 7.6 Hz, 1H), 7.34-7.31 (m, 2H), 7.15 (d, *J* = 8.0 Hz, 1H), 7.08 (t, *J* = 8.0 Hz, 1H), 6.98 (t, *J* = 8.0 Hz, 1H), 5.34 (d, *J* = 14.8 Hz, 1H), 5.25 (d, *J* = 14.8 Hz, 1H), 4.65 (t, *J* = 7.6 Hz, 1H), 3.31 (s peak is overlapped by water peak, 2H,); HRMS (ESI): *m/z* calcd for C<sub>24</sub>H<sub>17</sub>Br<sub>2</sub>F<sub>2</sub>N<sub>2</sub>O<sub>3</sub> [M+H]<sup>+</sup>: 576.95685, found 576.95715.

**Compound 2:** <sup>1</sup>H-NMR (400 MHz, CDCl<sub>3</sub>): δ = 8.46 (d, *J* = 1.2 Hz, 1H), 7.84-7.69 (m, 3H), 7.26-7.21 (m, 3H), 5.41 (s, 2H), 4.18 (q, *J* = 7.2 Hz, 2H), 3.96 (s, 2H), 1.23 (t, *J* = 7.2 Hz, 3H); GC-MS (ESI): C<sub>19</sub>H<sub>17</sub>BrFN<sub>2</sub>O<sub>3</sub> [M+H]<sup>+</sup>: 419.1.

**Compound 3:** <sup>1</sup>H-NMR (400 MHz, CDCl<sub>3</sub>): δ = 12.61 (s, 1H), 8.27 (d, *J* = 8.0 Hz, 1H), 7.95-7.84 (m, 3H), 3.95 (s, 2H).

**Compound 4:** <sup>1</sup>H-NMR (400 MHz, CDCl<sub>3</sub>): δ = 12.69 (s br, 1H), 8.31 (d, *J* = 7.6 Hz, 1H), 7.98-7.87 (m, 3H), 7.32-7.26 (m, 5H), 5.32 (s, 2H), 4.00 (s, 2H).

**Compound 5:** <sup>1</sup>H-NMR (400 MHz, CDCl<sub>3</sub>): δ = 12.72 (s br, 1H), 8.31 (d, *J* = 7.6 Hz, 1H), 7.99-7.87 (m, 3H), 7.36-7.24 (m, 2H), 7.04 (t, *J* = 8.4 Hz, 1H), 5.35 (s, 2H), 3.99 (s, 2H).

**Compound 6:** <sup>1</sup>H-NMR (400 MHz, CDCl<sub>3</sub>): δ = 12.79 (s br, 1H), 8.31 (d, *J* = 8.0 Hz, 1H), 7.97-7.87 (m, 3H), 7.52 (d, *J* = 7.2 Hz, 2H), 7.28 (t, *J* = 7.6 Hz, 2H), 5.29 (s, 2H), 3.99 (s, 2H); HRMS (ESI): *m/z* calcd for C<sub>17</sub>H<sub>14</sub>BrN<sub>2</sub>O<sub>3</sub> [M+H]<sup>+</sup>: 373.01823, found 373.01848.

**Compound 7:** <sup>1</sup>H-NMR (400 MHz, CDCl<sub>3</sub>): δ = 12.79 (s br, 1H), 8.31 (d, *J* = 7.6 Hz, 1H), 8.00-7.88 (m, 3H), 7.36-7.31 (m, 1H), 7.24-7.11 (m, 3H), 5.38 (s, 2H), 3.99 (s, 2H)



### **Supplemental reference**

1. Sriam, D., Yogeewari, P., Senthilkumar, P., Sangaraju, D., Nelli, R., Banerjee, D., Bhat, P., Manjashetty, H. (2010) Synthesis and antimycobacterial evaluation of novel Phthalazin-4-ylacetamides against log- and starved phase cultures. *Chem Biol Drug Des.* **75**, 381–391
